# Supplementary material for: An Efficient Preparation of Mulberroside A from the Branch Bark of Mulberry and Its Effect on the Inhibition of Tyrosinase Activity
Source: PubMed Central journal article supplement (PMC4192315; doi:10.1371/journal.pone.0109396), 2014-10-09

110213-MUL-H400  
B2

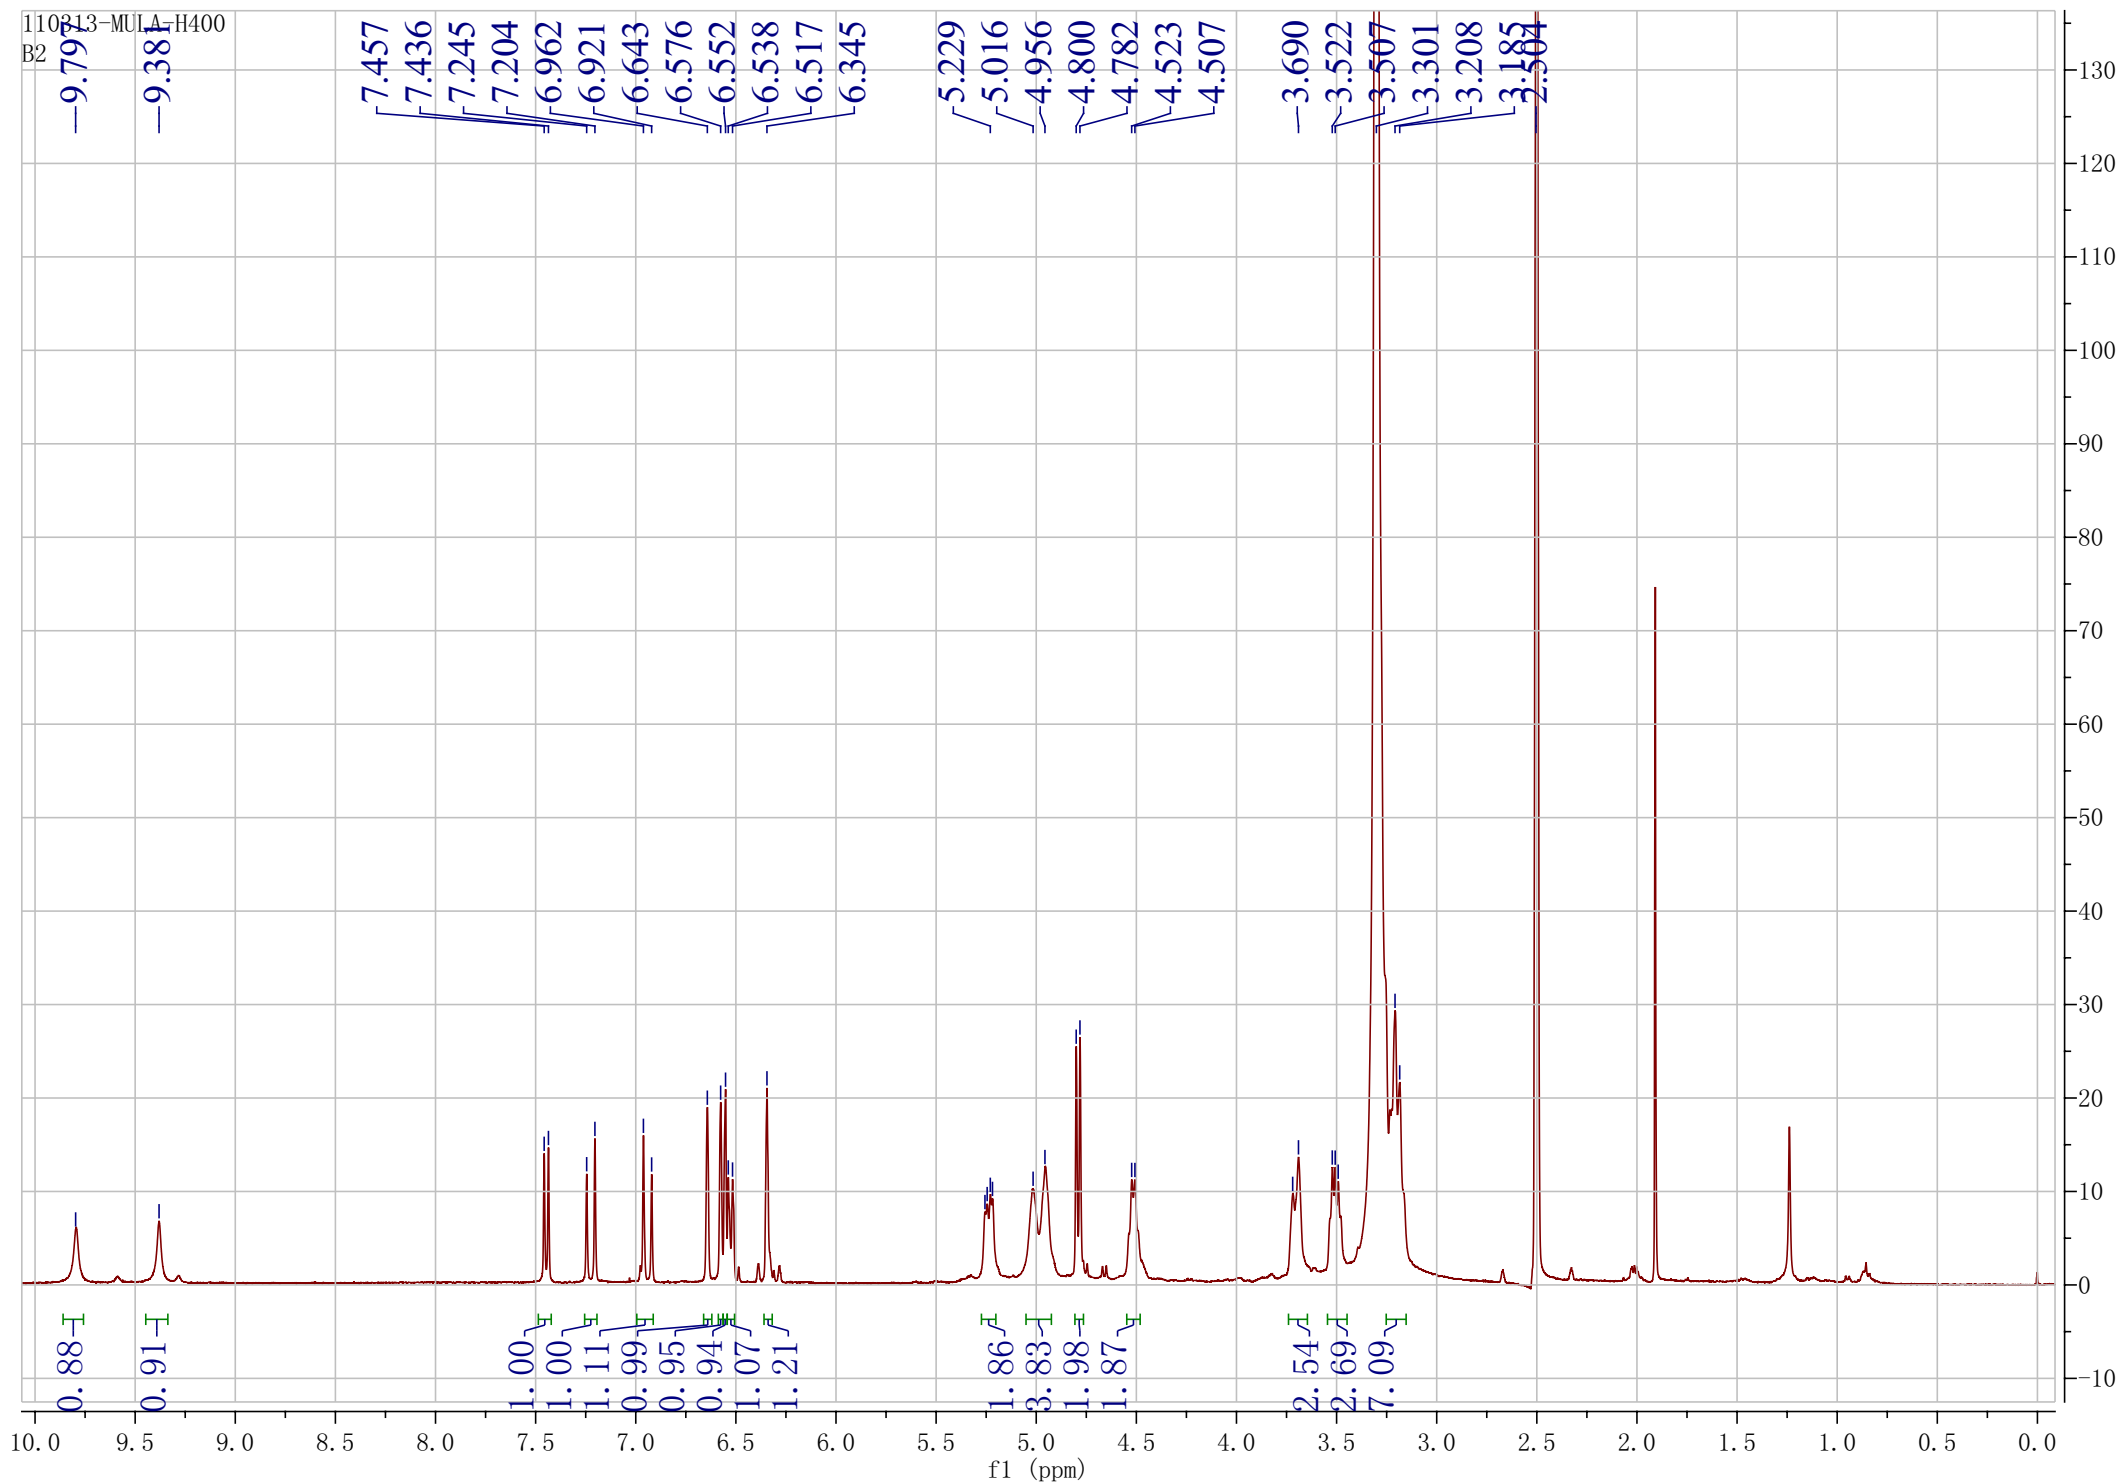

Supplement: pone.0109396.s003.pdf [file pone.0109396.s003.pdf]
